# Supplementary material for: femaleless Controls Sex Determination and Dosage Compensation Pathways in Females of Anopheles Mosquitoes
Source: PubMed Central journal article supplement (PMC7955153; doi:10.1016/j.cub.2020.12.014), 2021-03-08
Supplement: mmc1.pdf [file mmc1.pdf]

Current Biology, Volume 31

**Supplemental Information**

***femaleless* Controls Sex Determination  
and Dosage Compensation Pathways  
in Females of *Anopheles* Mosquitoes**

Elzbieta Krzywinska, Luca Ferretti, Jianwei Li, Jian-Chiuan Li, Chun-Hong Chen, and Jaroslaw Krzywinski

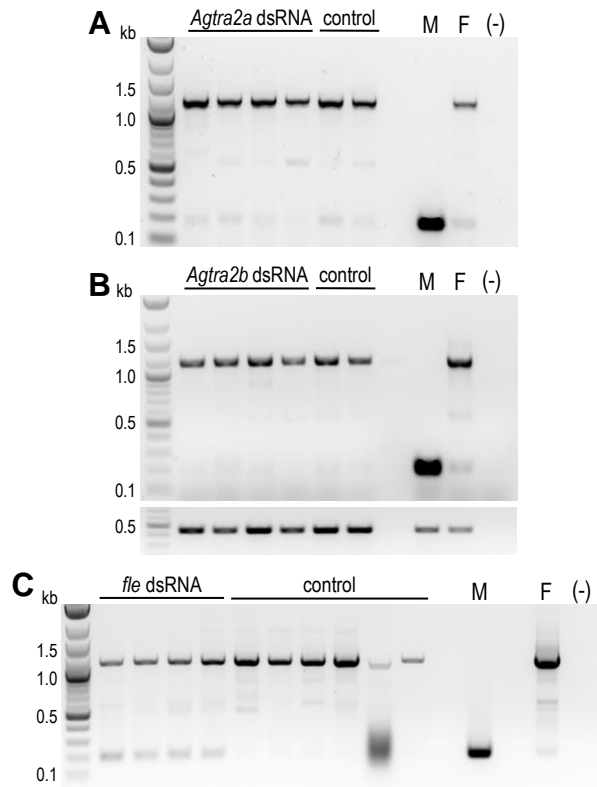

**Figure S1. Homologs of *tra2* do not control sex determination in *A. gambiae*. Related to Figure 1.** RT-PCR analysis of *dsx* splicing in the *A. gambiae* Sua5.1 cells transfected with in vitro-synthesized dsRNA of *A. gambiae tra2a* (AGAP029421) (**A**), *tra2b* (AGAP006798) (**B**), and *fle* (AGAP013051) (**C**), as compared to the control cells. No difference in *dsx* splicing pattern between the dsRNA-transfected and the control cell samples in **A** or **B** indicates that neither of the *tra2* paralogs is involved in the *A. gambiae* sex determination pathway. In contrast, *fle* dsRNA-transfected cells produce fewer female-specific *dsx* transcripts, which coincides with a clear production of male *dsx* transcript forms (**C**). Cropped elements of the gel image presented in **C**, with two poor quality RNA control sample lanes omitted, are shown in the main body of the paper as Fig. 1A. M and F, male and female pupae; (-), negative control.

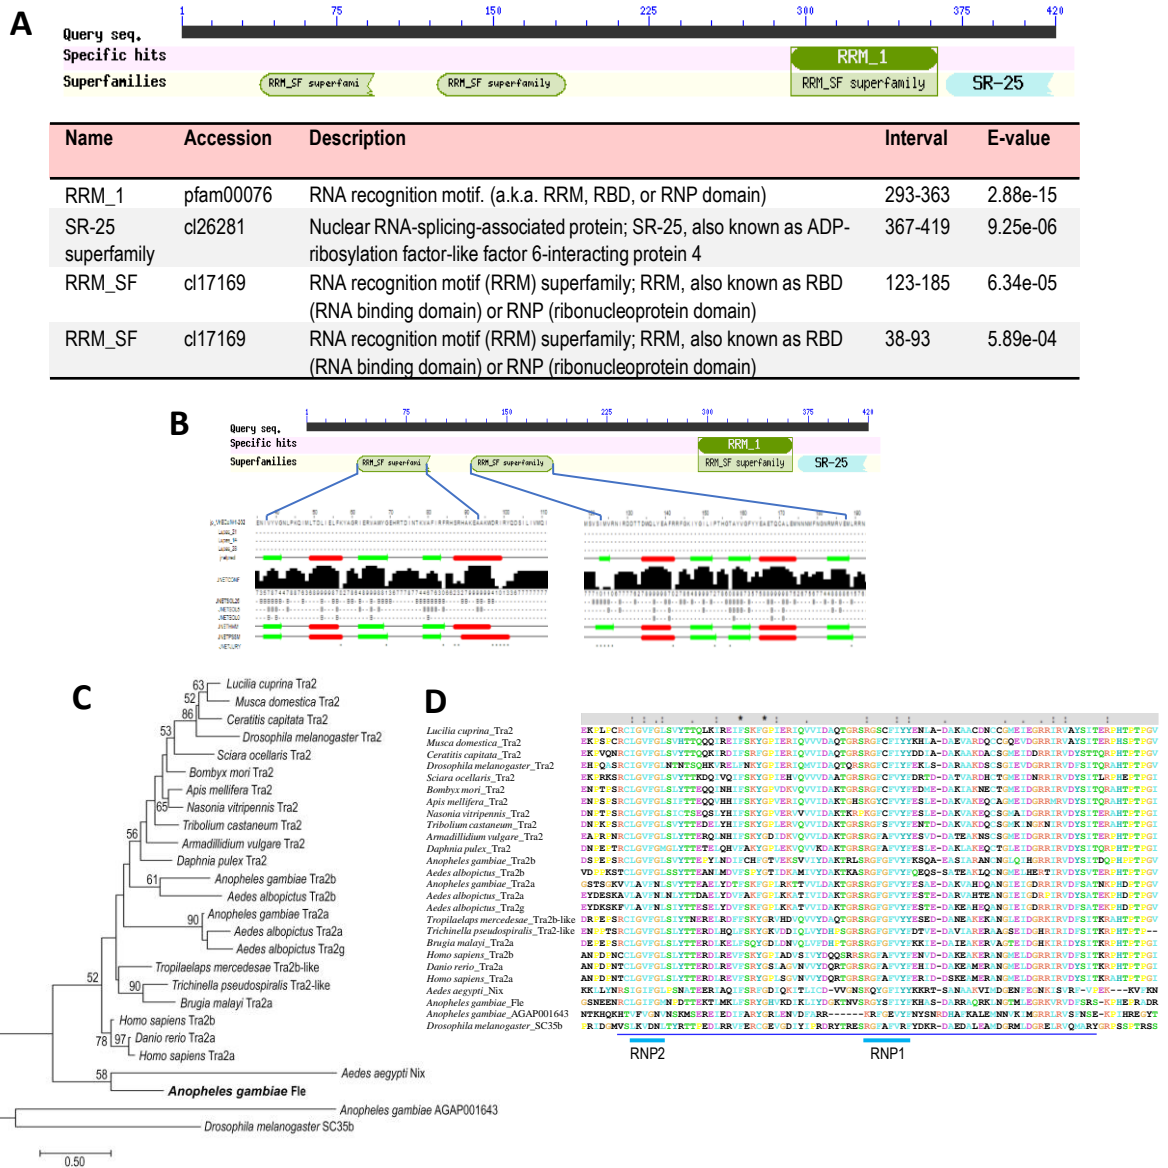

**Figure S2. *A. gambiae* Fle is an RRM protein with putative binding sites in *doublesex* and *fruitless*, and is not closely related to TRA2. Related to Figure 1. (A) Conserved domains in the *A. gambiae* Fle protein identified through a search against the Pfam v.31.0 database. (B) Jpred4-based secondary structure prediction of the putative RRM regions in Fle.  $\alpha$ -helices are marked in red and  $\beta$ -sheets in green. The truncated first putative RRM lacks the  $\beta_4$  sheet. (C) The maximum likelihood phylogenetic tree of Fle, representative Tra2, and other RRM proteins inferred with MEGA v. 7.0.26 using the JTT matrix-based model and a discrete Gamma distribution to model evolutionary rate differences among sites. The tree is drawn to scale, with branch lengths measured in the number of substitutions per site. The analysed data set consisted of amino acid sequences aligned using ClustalX2. All gapped alignment positions were eliminated prior to analysis; there were 82 positions in the final data set, covering RRM (C-terminus proximal in case of Fle) and its immediate flanks (see D). The tree is rooted with the *D. melanogaster* SR family splicing factor SC35. Numbers above or below branches representing bootstrap support >50% are based on 500 ML bootstrap replications. (D) An alignment of the amino acid region used for the phylogenetic reconstruction. Identical/similar positions are marked above, and the location of the RRM (thin line) and RNP sequence elements below, the alignment.**

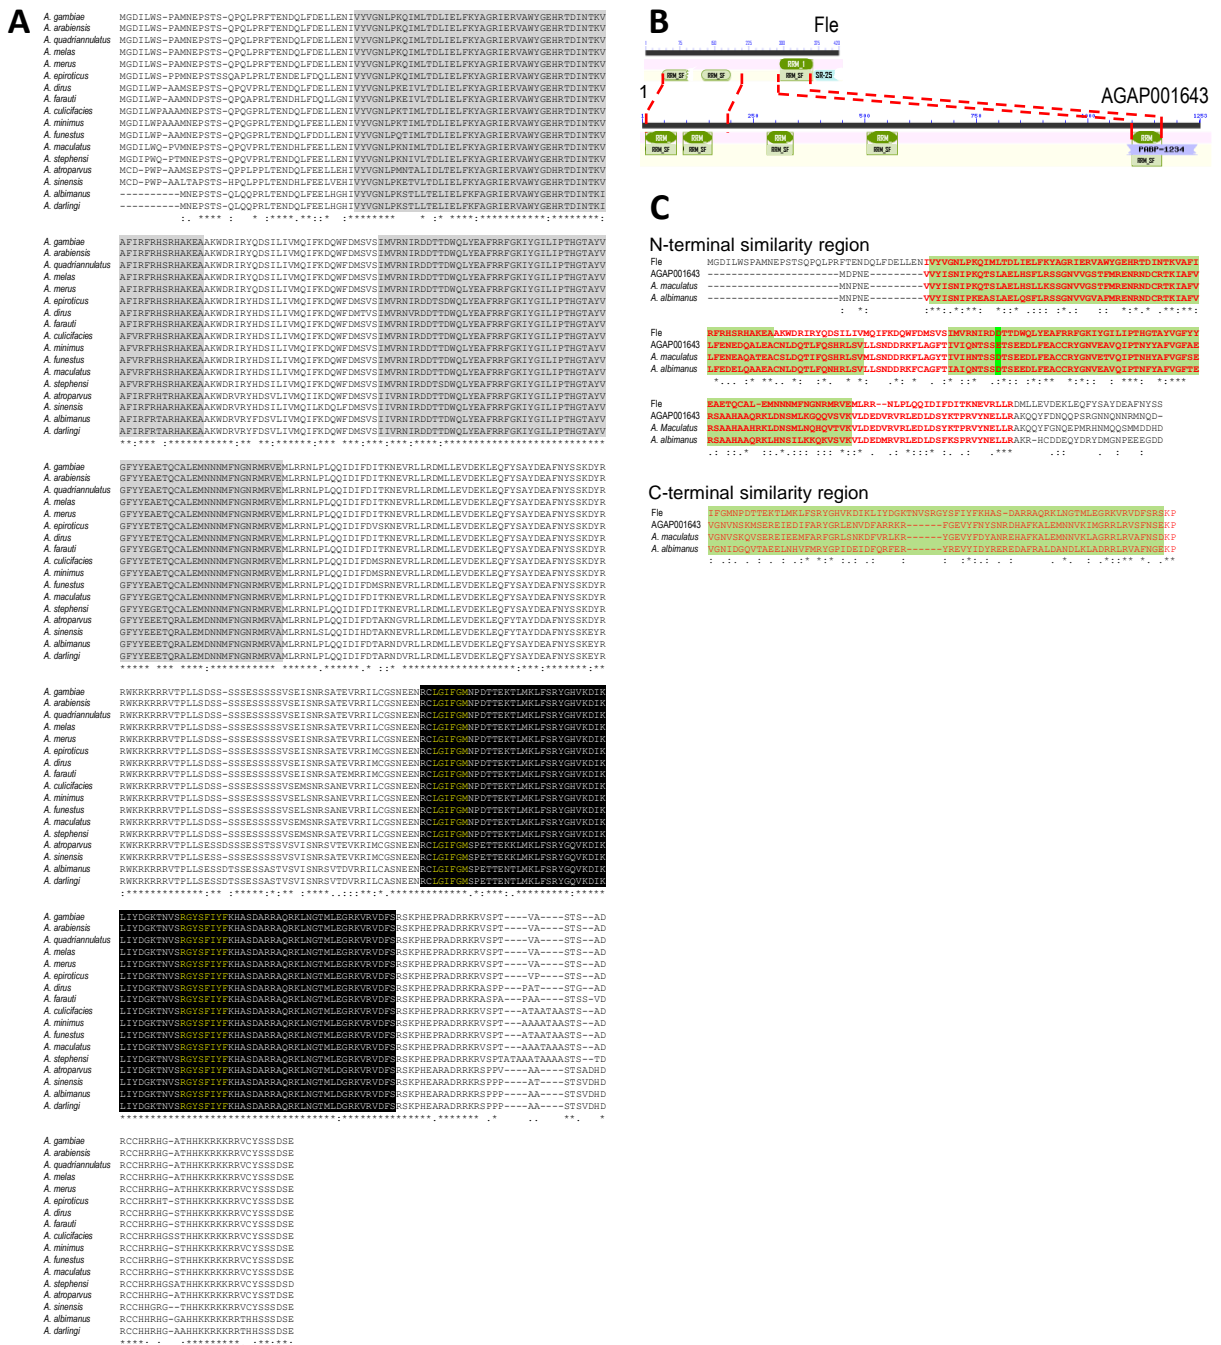

**Figure S3. A highly conserved *fle* may have originated by gene duplication in the recent common ancestor of *Anopheles* species. Related to Figure 1. (A) Amino acid sequence alignment of the *fle* orthologs from *Anopheles* species. The RRM region showing similarity to Tra2 RRM is shaded black, with the RPN-2 and RPN-1 elements in yellow font. Two other putative RRM regions are shaded grey. (B) A comparison of the Fle and AGAP001643 protein structures. Boundaries of a similarity region (BLASTp  $e$ -value =  $4e-20$ ) are marked by red lines. (C) Amino acid alignment of the N-terminal and C-terminal part of Fle and AGAP001643, respectively, with the similarity region marked in red, the RRM's shaded green, and the codon interrupted by an intron shaded bright green. Note a higher sequence similarity within the N-terminal region. AGAP001643 orthologs from *A. maculatus* and *A. albimanus* that split from *A. gambiae* approximately 36-70 Mya and 100 Mya, respectively, are also shown. The phylogenetic tree shown in Figure S2C has been inferred using a slightly extended C-terminal region (cf. Figure S2D) than that presented in (C).**

| Line | pBAC arm | Flanking genomic sequence   | Fragment length | % Identity to genome | Chromosomal integration position |
|------|----------|-----------------------------|-----------------|----------------------|----------------------------------|
| 3M   | L        | <b>TTAATAGGCACGTGCCTTCG</b> | 171             | 99                   | 3R: 15803701<br>3R: 15803704     |
|      | R        | <b>CCTGCCTGCTCGAGCTTTAA</b> |                 |                      |                                  |
| 4M2B | L only   | <b>TTAAAGGCTGTGGTACACTT</b> | 294             | 100 <sup>a</sup>     | UNK NW_161049: 12                |
| 4M3  | L        | <b>TTAAGGGTCTGCGCCAGGGG</b> | 224             | 89 <sup>b</sup>      | Undetermined                     |
|      | R        | <b>AGGCTTTTTGCTACCATTAA</b> | 248             | 91 <sup>b</sup>      | Undetermined                     |
| 4M4B | L        | <b>TTAAATCACCTTGTAACGAT</b> | 262             | 99                   | 2R: 21049616                     |
|      | R        | <b>TTGATTCTTGTTAGCTTTAA</b> | 304             | 98                   | 2R: 21049618                     |
| 4M4C | L        | <b>TTAAACTCAACGATGGCAAT</b> | 120             | 98, 95 <sup>c</sup>  | 3R: 28923242                     |
|      | R        | <b>TGTCAGGCGGTGGCATTAA</b>  | 180             | 98                   | 3R: 28923245                     |
| 4M6  | L        | <b>TTAAAAGAGGTGAGCCAGA</b>  | 459             | 99                   | 3L: 40448623                     |
|      | R        | <b>ATAATCCATCAACTGTTTAA</b> | 169             | 99                   | 3L: 40448620                     |

**Table S1. Transgene integration sites in the *A. gambiae* lines generated in this study. Related to Figure 2.**

<sup>a</sup> Integration site within the retrotransposon *zanzibar* fragment of unknown chromosomal location; maximum 93% identity within the mapped *An. gambiae* PEST scaffolds.

<sup>b</sup> Hit to a highly variable repetitive region differing between the *A. gambiae* strains; 94% identity to the *A. colluzzii* strain M genome.

<sup>c</sup> The sequence of a fragment isolated adjacent to the pBac L arm yielded a gapped BLAST result, due to the presence of a Tsessebe transposon insertion in the corresponding region within the *A. gambiae* PEST genome. Ungapped alignments, indicating absence of the Tsessebe insertion, were obtained with four other *A. gambiae* genome assemblies available in the NCBI whole genome shotgun contigs database.

| Target/Name                             | Name/sequence (5' – 3')                                                                        |                                                              |
|-----------------------------------------|------------------------------------------------------------------------------------------------|--------------------------------------------------------------|
|                                         | <b>PCR primers</b>                                                                             |                                                              |
| <i>A. gambiae fle</i><br>(AGAP013051)   | T7-fle-F2<br>TAATACGACTCACTATAGGGTGC GCACTGG<br>AAATGAACAA                                     | T7-fle-R2<br>TAATACGACTCACTATAGGGGTTCTTTTGCCG<br>TCGTAGA     |
|                                         | T7-fle-F2<br>Sequence as above                                                                 | T7-fle-R3<br>TAATACGACTCACTATAGGGACAGCGTTCTCC<br>TCGTTC      |
| <i>A. stephensi fle</i><br>(ASTE008781) | Aste_fleT7F<br>TAATACGACTCACTATAGGGATATACGGCAT<br>CCTGATACC                                    | Aste_fleT7R<br>TAATACGACTCACTATAGGGGCTTAAAGTAGAT<br>GAACGAG  |
| <i>tra2a</i><br>(AGAP006798)            | T7_Ag6798-F<br>TAATACGACTCACTATAGGGTGCAGTGAAGT<br>GTTGTTATTTTG                                 | T7_Ag6798-R<br>TAATACGACTCACTATAGGGCTTTCGAGTGGA<br>CCAAACT   |
| <i>tra2b</i><br>(AGAP029421)            | T7_Agtra2b-F<br>TAATACGACTCACTATAGGGTCCAGCAGCCA<br>TTGTGTCTA                                   | T7_Agtra2b-R<br>TAATACGACTCACTATAGGGACTACCGACTTTTC<br>CACCGT |
| <i>dsx</i><br>(AGAP004050)              | dsxF2 CCAGAACCTGTAATCTCCTAC                                                                    | dsxR5m GATGACTTCACCACCGCTTC                                  |
| <i>fru</i><br>(AGAP000080)              | Aga_fruF GGCAGCATCGGACTTGTTCA                                                                  | Aga_fruR ACGTCGCACAGTTTCTCATC                                |
| <i>rpS7</i><br>(AGAP010592)             | S7F TGCTGCAAACCTTCGGCTAT                                                                       | S7R CGCTATGGTGTTCGGTTCC                                      |
| <i>bla</i>                              | blaF_T7<br>TAATACGACTCACTATAGGGAACCTTATCCG<br>CCTCCATCC                                        | blaR_T7<br>TAATACGACTCACTATAGGGGCTATGTGGCGCG<br>GTATTAT      |
| <i>A. gambiae fle</i><br>RT_q-PCR       | JK1051 CGGATACGCTACCAAGACTCAATAC                                                               | JK1052 GTCGGTTGTATCGTCGCGT                                   |
| <i>rpS7</i><br>RT_q-PCR                 | JK1053<br>CAACAACAAGAAGGCGATCATCATC                                                            | JK1054 GCGCTCGGCAATGAACAC                                    |
| Inverse PCR<br>pBac right arm           | ITRR1F TACGCATGATTATCTTTAACGTA                                                                 | InpBacR2R TTGCTACTGACATTATGGCT                               |
|                                         | <b>Oligonucleotides for microRNA cistron construction</b>                                      |                                                              |
| Mir6.1_5'EcoRI/<br>Bsal/BglII           | GGCGAATTCATGGTCTCTTATGAGATCTTTTAAAGTCCACAACCTCATCAAGGAAAATGAAAGTCAAA<br>GTTGGCAGCTTACTTAAACTTA |                                                              |
| Mir6.1_3'NotI/Fs<br>el/BamHI            | GGCCGCGGCCGCTATGGCCGGCCGGATCCAAAACGGCATGGTTATTCGTGTGCCAAAAAAAAAAAA<br>AAATTAATAATGATGTTAGGCAC  |                                                              |
| AGAP013051_<br>miR-1-1                  | GGCAGCTTACTTAACTTAATCACAGCCTTTAATGTGCATCGTACAGACATCAACACGTAAGTTAAT<br>ATACCATATC               |                                                              |
| AGAP013051_<br>miR-1-2                  | AATAATGATGTTAGGCACTTTAGGTACGCATCGTACAGACATCAACACGTAGATATGGTATATTAAC<br>TTACGTG                 |                                                              |
| AGAP013051_<br>miR-2-1                  | GGCAGCTTACTTAACTTAATCACAGCCTTTAATGTGGATACGCTACCAAGACTCAATTAAGTTAATA<br>TACCATATC               |                                                              |
| AGAP013051_<br>miR-2-2                  | AATAATGATGTTAGGCACTTTAGGTACGGATACGCTACCAAGACTCAATTAGATATGGTATATTAAC<br>TTAATTG                 |                                                              |
| AGAP013051_<br>miR-3-1                  | GGCAGCTTACTTAACTTAATCACAGCCTTTAATGTAAAGACATCAAGCTAATCTACGTAAGTTAATA<br>TACCATATC               |                                                              |
| AGAP013051_<br>miR-3-2                  | AATAATGATGTTAGGCACTTTAGGTACAAAGACATCAAGCTAATCTACGTAGATATGGTATATTAAC<br>TACGTA                  |                                                              |

**Table S2. Oligonucleotides used in the study. Related to STAR Methods.**
